# Supplementary material for: Insertion Sequence–Driven Diversification Creates a Globally Dispersed Emerging Multiresistant Subspecies of E. faecium
Source: PLoS Pathog. 2007 Jan 26;3(1):e7. doi: 10.1371/journal.ppat.0030007 (PMC1781477; doi:10.1371/journal.ppat.0030007)
Supplement: Table S1 — (24 KB XLS) [file ppat.0030007.st001.xls]

## Sheet: Sheet1
Table S1	E. faecium core genome sequenced genes
	Spot ID	COG 1	contig	EfaeDRAFT	name	Gene symbol	no hits 2	sim (%) 3	e value
E.faecium DO genes
Information storage	Efm.047G11	J	563	339	Initiation factor 3	InfC	1	99	0
and processing	Efm.047G11	J	563	340	Ribosomal protein L35	RpmI	1	99	0
	Efm.032B06	J	595	675	Ribosomal protein S3	RpsC	1	96	0
	Efm.032B06	J	595	676	Ribosomal protein L16	RplP	2	99	0
	Efm.001F10	J						[100 (100)]	-26
	Efm.001F10	J	595	677	Ribosomal protein L29	RpmC	1	[100 (100)]	-26
	Efm.014B10	J	595	686	Ribosomal protein S5 bacterial and organelle form	RpsE	1	99	0
	Efm.014B10	J	595	687	Ribosomal protein L30 bacterial	RpmD	1	99	0
	Efm.021D03	J	623	R0014	16S rRNA		1	99	0
	Efm.028B07	J	565	R0033	16S rRNA		2	99	0
	Efm.028D07	J		R0033				100	0
	Efm.015E06	J	654	R0006	tRNA-Asn		2	99	0
	Efm.036G06	J		R0006
	Efm.001D05	J	654	R0007	16S rRNA		4	99	0
	Efm.028D05	J		R0007
	Efm.013H04	J		R0007
	Efm.015G03	J		R0007
	Efm.024C06	K	641	1573	DNA directed RNA poylmerase acetylornithine deacetylase	RpoC	1	100	0
	Efm.024C06	K	641	1574	DNA directed RNA poylmerase, beta subunit	RpoB	1	100	0
	Efm.027A09	L	588	595	DNA polymerase III; epsilon subunit: DnaQ exonuclease, DnaG helicase	DinG	1	100	0
Cellular processes	Efm.030B08	V	646	1741	ABC transporter, transmembrane region: ABC transporter	MdlB	1	99	0
	Efm.017B04	M	607	866	UPD-glucose-4-epimerase	GalE	1	100	0
	Efm.026G09	P	599	747	Cu-translocating P-type ATPase: heavy metal translocating P-type ATPase	ZntA	1	100	0
	Efm.019G01	P	650	1925	Potassion transporter Trk	TrkG	1	98	0
Metabolism	Efm.027B12	G	651	2045	Sodium: galatoside symporter	MelB	1	99	0
	Efm.028D04	E	588	597	Aminotransferase class I and II	COG0436	1	100	0
	Efm.008B12	E	651	2055	Aspartate kinase	LysC	1	99	0
	Efm.008B12	E	651	2056	Aspartate-semi aldehyde dehydrogenase USG-1 related	Asd	1	99	0
	Efm.018B06	H	629	1243	Folylpolyglutamate synthetase	FolC	1	99	0
	Efm.002H07	H	637	1450	Cytidyl transferase	NadD	1	99	0
	Efm.002H07	H	637	1451	Conserved hypothetical protein	COG1713	1	99	0
Poorly characterized	Efm.021B02	R	504	58	Auxin efflux carrier	COG0679	1	99	0
	Efm.018B06	R	629	1242	HAD superfamily hydrolase subfamily IA variants	COG0637	1	99	0
	Efm.025B11	R	642	1601	Protein of unknown function DUF 258	COG1162	1	99	0
	Efm.028D04	S	588	596	Conserved hypothetical protein	COG5353	1	100	0
	Efm.046D08	S	655	2338	Conserved hypothetical protein		1	100	0
Unknown	Efm.005G11		565				1	100	-116
	Efm.011G04		652				1	100	0
E.faecalis V583 genes
Information storage	Efm.006F03	J		EF2397	Translation elongation factor	tsf	1	83	-141
and processing	Efm.018B03	J		EF2398	Ribosomal protein S2	rpsB	1	90	0
	Efm.001H06	J		Ef5SB	5S rRNA		1	89	0
	Efm.001H06	J		tRNA-Asn-1			1	89	0
	Efm.001H06	J		tRNA-Ser-4			1	89	0
	Efm.001H06	J		tRNA-Glu-3			1	89	0
	Efm.001H06	J		tRNA-Val-2			1	89	0
	Efm.001H06	J		tRNA-Asp-3			1	89	0
Cellular processes	Efm.032B07	N		EF2367	N-acetyl muranolyl-L-alanine amidase family 4		1	[55 (82)]	-8
Poorly characterized	Efm.018B03	R		EF2399	Acetyltransferase GNAT family		1	90	0
	Efm.021F09	S		EF1877	Putative membrane protein		1	98	0
	Efm.045F12	S		EF2657	Putative membrane protein		1	[28 (52)]	-14
1 The different COG (cluster of orthologous genes) are represented by the following abbreviations: K, Transcription, L, DNA replication, recombination and repair, J, Translation ribosomal structure and biogenesis,
V, Defense mechanisms, M, Cell membrane biogenesis, G, Carbohydrate transport and metabolism, E, Amino acid transport and metabolism, H, Coenzyme metabolism, P, Inorganic ion transport and metabolism,
R, General function prediction only, S, Function unknown.
2 No hits, number of times this gene was identified from core genome inserts.
3 Nucleotide similarity is given in %, protein identity is given between brackets in %, protein similarity between square brackets in%.
